# Supplementary material for: Long term results of a prospective multicenter obervational study on the use of anti-human T-lymphocyte immunoglobulin (ATLG) in unrelated donor transplantation (ATOS study)
Source: Research Square preprint supplement (doi:10.21203/rs.3.rs-3649430/v1), 2023-11-30
Supplement: Supplementary file 1 [file f621b902cb8f3ec53918ea25.docx]

**Supplementary appendix**

Table S1: Total given ATLG-dose by center

|  |  | Total given dose per kg [mg/kg] | | | |
| --- | --- | --- | --- | --- | --- |
| Center | N | Mean | Median | IQR | (Minimum, Maximum) |
| 01 | 40 | 32.2 | 32 | (31,34) | (15,36) |
| 02 | 5 | 41.8 | 44 | (30,45) | (29,61) |
| 03 | 1 | 35.2 | 35 | (35,35) | (35,35) |
| 04 | 4 | 60.0 | 60 | (60,60) | (60,60) |
| 05 | 24 | 51.4 | 59 | (37,60) | (28,62) |
| 06 | 13 | 46.0 | 59 | (30,60) | (24,62) |
| 08 | 11 | 30.8 | 30 | (30,32) | (28,36) |
| 09 | 5 | 55.2 | 60 | (50,60) | (46,60) |
| 10 | 14 | 60.3 | 60 | (60,61) | (57,62) |
| 12 | 8 | 50.7 | 58 | (40,60) | (30,61) |
| 15 | 4 | 59.8 | 60 | (59,61) | (58,61) |
| 20 | 6 | 54.8 | 60 | (59,60) | (30,60) |
| 21 | 30 | 53.7 | 59 | (40,60) | (25,91) |
| **Total** | **165** | **46.4** | **46** | **(32,60)** | **(15,91)** |

Table S2: Comparison of patients in the ATOS study with patients in the ATLG arm of our RCT with respect to different endpoints: Multiple Cox regression models adjusted for patient age, donor age, disease status, conditioning intensity, stem-cell source, HLA-mismatch, ATLG-dose

|  | ATOS vs. ATLG (RCT) | | | |
| --- | --- | --- | --- | --- |
| Endpoint | Hazard ratio | 95%-CI | | p-value |
| Severe GvHD and relapse-free survival (SGRFS) | 1.25 | 0.81 | 1.91 | 0.31 |
| Acute GvHD (any) | 0.92 | 0.58 | 1.44 | 0.71 |
| Acute GvHD (grade III-IV)) | 0.78 | 0.24 | 2.52 | 0.68 |
| Chronic GvHD (any) | 1.46 | 0.78 | 2.70 | 0.23 |
| Chronic GvHD (severe) | 2.79 | 1.20 | 6.51 | 0.017 |
| Relapse | 0.91 | 0.51 | 1.65 | 0.76 |
| Non-relapse mortality (NRM) | 0.53 | 0.23 | 1.25 | 0.15 |
| Disease-free survival (DFS) | 0.78 | 0.48 | 1.27 | 0.32 |
| Overall survival (OS) | 0.70 | 0.41 | 1.18 | 0.18 |

Table S3

Summary of all adverse drug reactions (ADR) and severe infections by system organ class and preferred term

|  | | **Incidence of ADR and severe infections** | |
| --- | --- | --- | --- |
| **System organ class** | **Preferred term** | **N** | **Total %** |
| Total number of patients |  | 165 | 100.0 |
| Number of patients with at least one ADR |  | 157 | 95.2 |
| Infections and infestations |  | 113 | 68.5 |
|  | Pneumonia | 22 | 13.3 |
|  | Cytomegalovirus infection | 20 | 12.1 |
|  | Sepsis | 16 | 9.7 |
|  | Device related infection | 13 | 7.9 |
|  | Oral herpes | 13 | 7.9 |
|  | Infection | 9 | 5.5 |
| General disorders and administration site conditions |  | 73 | 44.2 |
|  | Pyrexia | 67 | 40.6 |
|  | Chills | 27 | 16.4 |
| Investigations |  | 62 | 37.6 |
|  | Blood bilirubin increased | 51 | 30.9 |
|  | Blood creatinine increased | 10 | 6.1 |
| Blood and lymphatic system disorders |  | 52 | 31.5 |
|  | Febrile neutropenia | 44 | 26.7 |
| Gastrointestinal disorders |  | 40 | 24.2 |
|  | Nausea | 11 | 6.7 |
|  | Stomatitis | 11 | 6.7 |
|  | Diarrhea | 10 | 6.1 |
| Vascular disorders |  | 19 | 11.5 |
|  | Hypotension | 10 | 6.1 |
| Cardiac disorders |  | 17 | 10.3 |
| Hepatobiliary disorders |  | 15 | 9.1 |
| Skin and subcutaneous tissue disorders |  | 15 | 9.1 |
| Respiratory, thoracic and mediastinal disorders |  | 11 | 6.7 |
| Nervous system disorders |  | 10 | 6.1 |
| Renal and urinary disorders |  | 10 | 6.1 |

Figure S1: Estimated probability of overall survival (OS) by disease status - unadjusted and from Cox regression model adjusted for center, type of disease, conditioning intensity, time from primary diagnosis of current disease to transplantation, HLA-mismatch,

Figure S2: Estimated probability of severe GvHD and relapse-free survival (SGRFS) by HLA-mismatch - unadjusted and from Cox regression model adjusted for center, patient age, patient and donor sex, type of disease, disease status, conditioning regimen

Figure S3: Probability of overall survival (OS) by ATLG-dose - unadjusted and from Cox regression model adjusted for center, patient age, donor age, CMV status of patient, type of disease, disease status, time from primary diagnosis of current disease to transplantation, HLA-mismatch

Figure S4: Estimated probability of overall survival (OS) by center and ATLG-dose - unadjusted and from Cox regression model adjusted for patient age, donor age, CMV status of patient, type of disease, disease status, time from primary diagnosis of current disease to transplantation, HLA-mismatch
